# Supplementary material for: Genetic Variations miR-10aA>T, miR-30cA>G, miR-181aT>C, and miR-499bA>G and the Risk of Recurrent Pregnancy Loss in Korean Women
Source: MDPI journal article supplement (doi:10.3390/biomedicines10102395), 2022-09-25
Supplement: s1 [file s1]

**Supplementary Table S1. Genotype frequencies of miRNA gene polymorphisms in control subjects and recurrent pregnancy loss patients.**

| Genotype                 | Controls<br>(n=281) | RPL<br>patients<br>(n=381) | AOR (95% CI)            | <i>P</i>     | FDR- <i>P</i> |
|--------------------------|---------------------|----------------------------|-------------------------|--------------|---------------|
| <i>miR-10aA&gt;T</i>     |                     |                            |                         |              |               |
| AA                       | 230 (81.9)          | 285 (74.8)                 | 1.000 (reference)       |              |               |
| AT                       | 50 (17.8)           | 88 (23.1)                  | 1.420<br>(0.963–2.094)  | 0.077        | 0.584         |
| TT                       | 1 (0.4)             | 8 (2.1)                    | 6.476<br>(0.804–52.176) | 0.079        | 0.237         |
| Dominant (AA vs. AT+TT)  |                     |                            | 1.520<br>(1.038–2.227)  | <b>0.032</b> | 0.709         |
| Recessive (AA+AT vs. TT) |                     |                            | 6.003<br>(0.746–48.285) | 0.092        | 0.276         |
| HWE <i>P</i>             | 0.318               | 0.695                      |                         |              |               |
| <i>miR-30cA&gt;G</i>     |                     |                            |                         |              |               |
| AA                       | 106 (37.7)          | 163 (42.8)                 | 1.000 (reference)       |              |               |
| AG                       | 144 (51.2)          | 182 (47.8)                 | 0.821<br>(0.591–1.139)  | 0.237        | 0.237         |
| GG                       | 32 (11.0)           | 36 (9.4)                   | 0.742<br>(0.432–1.276)  | 0.281        | 0.422         |
| Dominant (AA vs. AG+GG)  |                     |                            | 0.810<br>(0.591–1.111)  | 0.191        | 0.191         |
| Recessive (AA+AG vs. GG) |                     |                            | 0.842<br>(0.506–1.400)  | 0.507        | 0.606         |
| HWE- <i>p</i>            | 0.104               | 0.144                      |                         |              |               |
| <i>miR-181aT&gt;C</i>    |                     |                            |                         |              |               |
| TT                       | 198 (70.5)          | 247 (64.8)                 | 1.000 (reference)       |              |               |
| TC                       | 78 (27.8)           | 125 (32.8)                 | 1.286<br>(0.916–1.805)  | 0.147        | 0.221         |
| CC                       | 5 (1.8)             | 9 (2.4)                    | 1.483<br>(0.488–4.509)  | 0.487        | 0.487         |
| Dominant (TT vs. TC+CC)  |                     |                            | 1.294<br>(0.929–1.803)  | 0.128        | 0.191         |
| Recessive (TT+TC vs. CC) |                     |                            | 1.337<br>(0.443–4.037)  | 0.606        | 0.606         |
| HWE- <i>p</i>            | 0.393               | 0.137                      |                         |              |               |
| <i>miR-499bA&gt;G</i>    |                     |                            |                         |              |               |
| AA                       | 188 (66.9)          | 221 (58.0)                 | 1.000 (reference)       |              |               |
| AG                       | 87 (31.0)           | 139 (36.5)                 | 1.361<br>(0.977–1.896)  | 0.068        | 0.204         |
| GG                       | 6 (2.1)             | 21 (5.5)                   | 2.956<br>(1.168–7.482)  | <b>0.022</b> | 0.066         |
| Dominant (AA vs. AG+GG)  |                     |                            | 1.465<br>(1.062–2.020)  | <b>0.020</b> | 0.060         |
| Recessive (AA+AG vs. GG) |                     |                            | 2.677<br>(1.066–6.725)  | <b>0.036</b> | 0.108         |
| HWE- <i>p</i>            | 0.263               | 0.888                      |                         |              |               |

Abbreviations: AOR, adjusted odds ratio; CI, confidence interval; FDR-*P*, false-positive discovery rate-corrected; PL, pregnancy loss; RPL, recurrent pregnancy loss.

**Supplementary Table S2. Four allele combination analysis of miRNA polymorphisms in recurrent pregnancy loss patients and control subjects.**

| Allele combination                                               | Control<br>(n= 281) | Case<br>(n=381) | OR(95% CI)               | <i>P</i> <sup>a</sup> | FDR- <i>P</i> |
|------------------------------------------------------------------|---------------------|-----------------|--------------------------|-----------------------|---------------|
| <i>miR-10aA&gt;T/miR 181a T&gt;C/miR-30cA&gt;G/miR-499A&gt;G</i> |                     |                 |                          |                       |               |
| A-T-A-A                                                          | 236                 | 272             | 1.000 (reference)        |                       |               |
| A-T-A-G                                                          | 39                  | 66              | 1.468 (0.953 - 2.263)    | 0.085                 | 0.128         |
| A-T-G-A                                                          | 129                 | 139             | 0.935 (0.695 - 1.257)    | 0.705                 | 0.705         |
| A-T-G-G                                                          | 28                  | 63              | 1.952 (1.210 - 3.149)    | <b>0.006</b>          | 0.036         |
| A-C-A-A                                                          | 44                  | 59              | 1.163 (0.759 - 1.784)    | 0.516                 | 0.619         |
| A-C-A-G                                                          | 10                  | 27              | 2.343 (1.111 - 4.942)    | <b>0.026</b>          | 0.056         |
| A-C-G-A                                                          | 13                  | 32              | 2.136 (1.095 - 4.165)    | <b>0.028</b>          | 0.056         |
| A-C-G-G                                                          | 12                  | 0               | 0.035 (0.002 - 0.590)    | <b>0.0001</b>         | 0.0001        |
| T-T-A-A                                                          | 11                  | 44              | 3.471 (1.752 - 6.874)    | <b>0.0001</b>         | 0.0001        |
| T-T-A-G                                                          | 7                   | 23              | 2.851 (1.202 - 6.764)    | <b>0.014</b>          | 0.056         |
| T-T-G-A                                                          | 21                  | 11              | 0.455 (0.215 - 0.962)    | <b>0.044</b>          | 0.088         |
| T-T-G-G                                                          | 4                   | 2               | 0.434 (0.079 - 2.391)    | 0.425                 | 0.425         |
| T-C-A-A                                                          | 9                   | 18              | 1.735 (0.765 - 3.937)    | 0.235                 | 0.313         |
| T-C-A-G                                                          | 0                   | 0               | -                        | -                     |               |
| T-C-G-A                                                          | 0                   | 7               | 13.020 (0.739 - 229.300) | <b>0.017</b>          | 0.017         |
| T-C-G-G                                                          | 0                   | 0               | -                        | -                     |               |

Abbreviations: CI, confidence interval; FDR, false-discovery rate; OR, odds ratio; RPL, recurrent pregnancy loss. ORs and 95% CIs for each allele combination were calculated with reference to frequencies of all others using Fisher's exact test.

<sup>a</sup>Fisher's exact test. <sup>b</sup>FDR-adjusted *P*-value.

**Supplementary Table S3. Three allele combination analysis of miRNA polymorphisms in recurrent pregnancy loss patients and control subjects.**

| Allele combination                                       | Control<br>(n= 281) | Case<br>(n=381) | OR(95% CI)               | <i>P</i> <sup>a</sup> | FDR- <i>P</i> |
|----------------------------------------------------------|---------------------|-----------------|--------------------------|-----------------------|---------------|
| <b><i>miR-10aA&gt;T/miR-181aT&gt;C/miR-30cA&gt;G</i></b> |                     |                 |                          |                       |               |
| A-T-A                                                    | 275                 | 340             | 1.000 (reference)        |                       |               |
| A-T-G                                                    | 156                 | 201             | 1.042 (0.801 - 1.355)    | 0.789                 | 1.000         |
| A-C-A                                                    | 53                  | 84              | 1.282 (0.878 - 1.872)    | 0.216                 | 0.432         |
| A-C-G                                                    | 26                  | 33              | 1.027 (0.599 - 1.758)    | 1.000                 | 1.000         |
| T-T-A                                                    | 19                  | 64              | 2.724 (1.594 - 4.658)    | 0.0001                | 0.000         |
| T-T-G                                                    | 24                  | 13              | 0.438 (0.219 - 0.877)    | 0.026                 | 0.039         |
| T-C-A                                                    | 9                   | 20              | 1.797 (0.805 - 4.011)    | 0.181                 | 0.181         |
| T-C-G                                                    | 0                   | 7               | 12.140 (0.690 - 213.600) | 0.020                 | 0.039         |
| <b><i>miR-181aT&gt;C/miR-30cA&gt;G/miR-499A&gt;G</i></b> |                     |                 |                          |                       |               |
| T-A-A                                                    | 242                 | 316             | 1.000 (reference)        |                       |               |
| T-A-G                                                    | 45                  | 89              | 1.515 (1.020 - 2.250)    | 0.041                 | 0.090         |
| T-G-A                                                    | 154                 | 150             | 0.746 (0.564 - 0.987)    | 0.045                 | 0.090         |
| T-G-G                                                    | 32                  | 64              | 1.532 (0.971 - 2.417)    | 0.073                 | 0.097         |
| C-A-A                                                    | 60                  | 77              | 0.983 (0.674 - 1.433)    | 0.924                 | 0.924         |
| C-A-G                                                    | 8                   | 26              | 2.489 (1.107 - 5.596)    | 0.031                 | 0.031         |
| C-G-A                                                    | 7                   | 38              | 4.157 (1.825 - 9.473)    | 0.000                 |               |
| C-G-G                                                    | 13                  | 3               | 0.177 (0.050 - 0.627)    | 0.004                 | 0.008         |

Abbreviations: CI, confidence interval; FDR, false-discovery rate; OR, odds ratio; RPL, recurrent pregnancy loss. ORs and 95% CIs for each allele combination were calculated with reference to frequencies of all others using Fisher's exact test.

<sup>a</sup>Fisher's exact test. <sup>b</sup>FDR-adjusted *P*-value.

**Supplementary Table S4. Two allele combination analysis of miRNA polymorphisms in recurrent pregnancy loss patients and control subjects.**

| Allele combination                         | Control<br>(n= 281) | Case<br>(n=381) | OR(95% CI)            | <i>P</i> <sup>a</sup> | FDR- <i>P</i> |
|--------------------------------------------|---------------------|-----------------|-----------------------|-----------------------|---------------|
| <b><i>miR-10aA&gt;T/miR-181aT&gt;C</i></b> |                     |                 |                       |                       |               |
| A-T                                        | 430                 | 541             | 1.000 (reference)     |                       |               |
| A-C                                        | 80                  | 117             | 1.162 (0.851 - 1.587) | 0.386                 | 0.386         |
| T-T                                        | 44                  | 78              | 1.409 (0.953 - 2.083) | 0.099                 | 0.149         |
| T-C                                        | 8                   | 26              | 2.583 (1.158 - 5.764) | <b>0.021</b>          | 0.063         |
| <b><i>miR-10aA&gt;T/miR-30cA&gt;G</i></b>  |                     |                 |                       |                       |               |
| A-A                                        | 329                 | 424             | 1.000 (reference)     |                       |               |
| A-G                                        | 181                 | 234             | 1.003 (0.788 - 1.277) | 1.000                 | 1.000         |
| T-A                                        | 27                  | 84              | 2.414 (1.529 - 3.813) | <b>0.0001</b>         | 0.0001        |
| T-G                                        | 25                  | 20              | 0.621 (0.339 - 1.137) | 0.125                 | 0.125         |
| <b><i>miR-181aT&gt;C/miR-30cA&gt;G</i></b> |                     |                 |                       |                       |               |
| T-A                                        | 289                 | 405             | 1.000 (reference)     |                       |               |
| T-G                                        | 185                 | 214             | 0.825 (0.644 - 1.058) | 0.145                 | 0.435         |
| C-A                                        | 66                  | 103             | 1.114 (0.790 - 1.571) | 0.601                 | 0.601         |
| C-G                                        | 22                  | 40              | 1.297 (0.755 - 2.230) | 0.419                 | 0.601         |

Abbreviations: CI, confidence interval; FDR, false-discovery rate; OR, odds ratio; RPL, recurrent pregnancy loss. ORs and 95% CIs for each allele combination were calculated with reference to frequencies of all others using Fisher's exact test.

<sup>a</sup>Fisher's exact test. <sup>b</sup>FDR-adjusted *P*-value.
